# Supplementary material for: Lipid droplet biogenesis and COX-2 pathway activation are triggered by Barrett’s esophagus and adenocarcinoma, but not esophageal squamous cell carcinoma risk factors
Source: PubMed Central journal article supplement (PMC7807011; doi:10.1038/s41598-020-80035-4), 2021-01-13
Supplement: 41598_2020_80035_MOESM1_ESM.pdf [file 41598_2020_80035_MOESM1_ESM.pdf]

## **Title**

### **Lipid droplets biogenesis and COX-2 pathway activation are triggered by esophageal adenocarcinoma (EAC), but not esophageal squamous carcinoma (ESCC), associated risk factors**

Carrossini, N.<sup>1#</sup>; Meireles Da Costa, N.<sup>1#</sup>; Andrade-Barreto E.<sup>2</sup>; Sousa, V. P. L.<sup>1</sup>; Nicolau-Neto, P.<sup>1</sup>; Souza-Santos, P.T. <sup>1</sup>; Mansur, G.R. <sup>3</sup>; Wernersbach, L. <sup>4</sup>; Bozza, P.T. <sup>2</sup>; Viola, J.P.B. <sup>5</sup>; Ribeiro Pinto, L.F.<sup>1\*</sup>

*#Carrossini, N. and Meireles Da Costa, N. equally contributed to this work*

*\*Corresponding author*

#### **Authors and affiliations:**

1. Molecular Carcinogenesis Program, Brazilian National Cancer Institute – INCA. Rua André Cavalcanti, 37 – 6º andar, Centro, Rio de Janeiro, RJ, Brasil. CEP: 20231-050.
2. Laboratory of Immunopharmacology, Oswaldo Cruz Institute - FIOCRUZ. Av. Brasil 4365, Manguinhos - Rio de Janeiro - RJ – Brasil. CEP.: 21040-360
3. Endoscopy Section, Brazilian National Cancer Institute – INCA. Praça Cruz Vermelha, 23 – 8º andar, Centro, Rio de Janeiro, RJ, Brasil. CEP.: 20230-130.
4. Pathology Division, Brazilian National Cancer Institute – INCA. Rua Cordeiro da Graça, 156, Santo Cristo, Rio de Janeiro, RJ, Brasil. CEP.: 20220-400.
5. Program of Immunology and Tumor Biology, Brazilian National Cancer Institute – INCA. Rua André Cavalcanti, 37 – 5º andar, Centro, Rio de Janeiro, RJ, Brasil. CEP: 20231-050.

#### **Corresponding Author:**

Dr. Luis Felipe Ribeiro Pinto

Head of the Molecular Carcinogenesis Program (PCM),

Research Coordination (CPQ),

Brazilian National Cancer Institute (INCA),

Rua André Cavalcanti, 37-Centro, 6º andar

Rio de Janeiro, CEP 20231-050 RJ, Brazil.

tel. +55 21 32076598

fax. +55 21 32076536

## Supplementary Figure 1

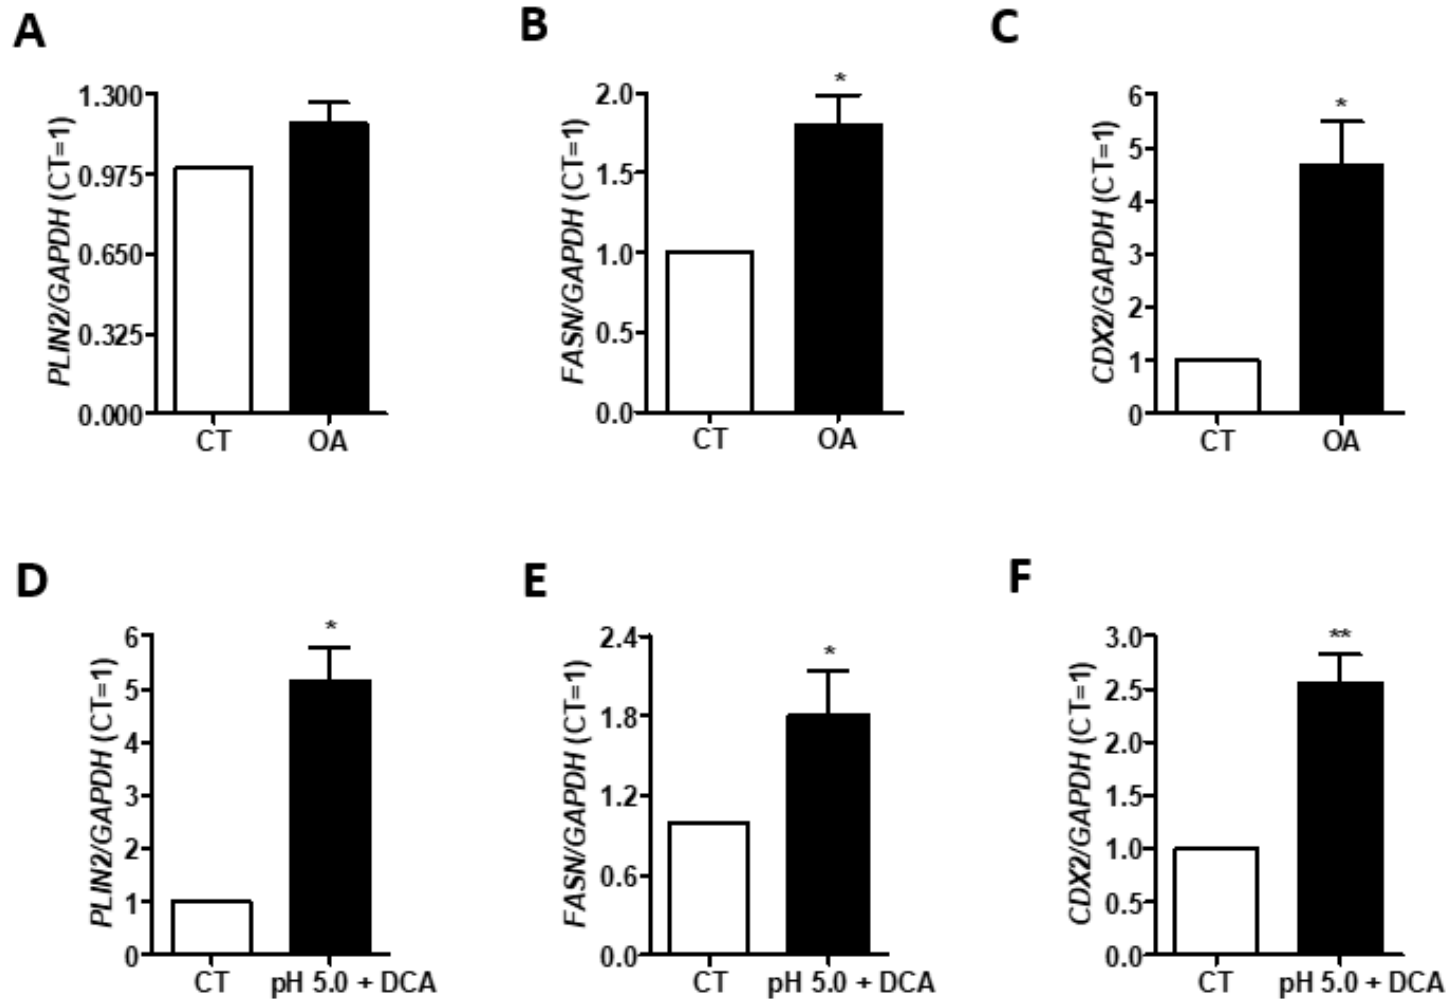

Supp Fig. 1 *PLIN2*, *FASN*, *CDX2* expression evaluation in the normal immortalized esophageal cell line, Het1a, upon exposure to esophageal adenocarcinoma (EAC) risk factors associated-stimuli. *PLIN2* (A and D), *FASN* (B and E), *CDX2* (C and F) mRNA levels were assessed by RT-qPCR in Het1a cells incubated with 5 $\mu$ M of Oleic Acid (OA) for 24h and stimulated with 5 pulses (3 min each) of acidified culture medium (pH 5.0) containing 200 $\mu$ M of DCA. Experiments were performed in triplicate \*p<0.05; \*\*p<0.005

## Supplementary Figure 2

**A**

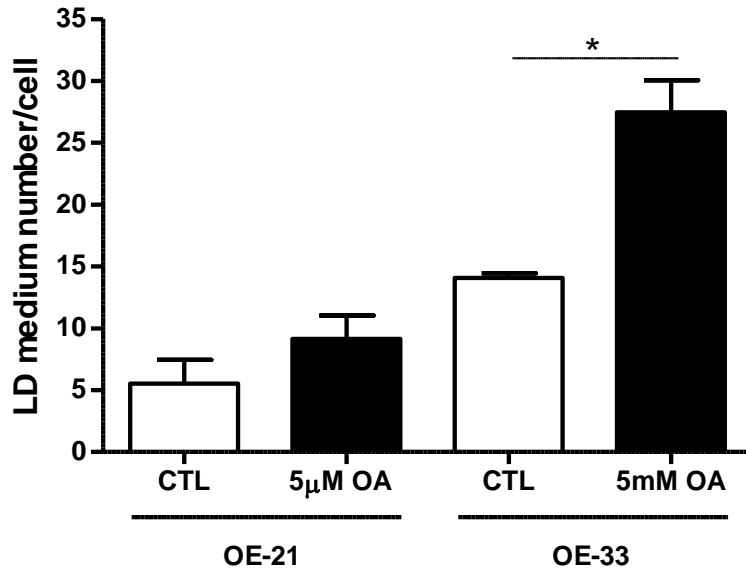

**B**

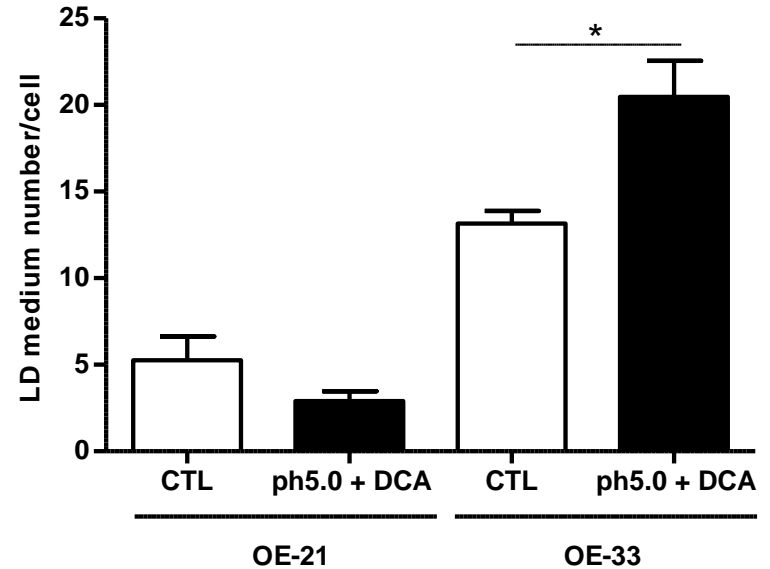

**Supp Fig. 2 Evaluation of Lipid Droplets (LD) number in esophageal squamous cell (ESCC) and adenocarcinoma (EAC) cell lines, upon exposure to esophageal adenocarcinoma (EAC) risk factors associated-stimuli.** LD quantification assessed by Oil Red O (ORO) staining in the esophageal squamous cell carcinoma (OE21) and adenocarcinoma (OE33) cell lines cells incubated with 5μM of Oleic Acid (OA) for 24h (A) and stimulated with 5 pulses (3 min each) of acidified culture medium (pH 5.0) containing 200μM of DCA (B). Experiments were performed in triplicate \*p<0.05.

Supplementary Table 1: Clinicopathological characteristics of the individuals and patients comprised in the study

|                                        | NOE (n=10) |       | OE (n=22) |       | BE (n=19) |       | EAC (n=59)      |       | ESCC (n=25)   |       |
|----------------------------------------|------------|-------|-----------|-------|-----------|-------|-----------------|-------|---------------|-------|
| Characteristics                        |            |       |           |       |           |       |                 |       |               |       |
| <b>Age</b>                             |            |       |           |       |           |       |                 |       |               |       |
| Median (years)                         | 55.0       |       | 34.5      |       | 64.0      |       | 62.0            |       | 56.0          |       |
| (Range)                                | (28 – 84)  |       | (27 – 60) |       | (16 – 83) |       | (34 – 83)       |       | (36 – 84)     |       |
| <b>Follow-up</b>                       |            |       |           |       |           |       |                 |       |               |       |
| Median (months)                        |            |       |           |       |           |       | 12.13           |       | 31.56         |       |
| (Range)                                |            |       |           |       |           |       | (0.86 – 139.53) |       | (0.5 – 122.4) |       |
|                                        | n          | %     | n         | %     | n         | %     | n               | %     | n             | %     |
| <b>Gender</b>                          |            |       |           |       |           |       |                 |       |               |       |
| Female                                 | 4          | 40.0% | 11        | 50.0% | 10        | 52.6% | 7               | 11.8% | 6             | 24.0% |
| Male                                   | 6          | 60.0% | 11        | 50.0% | 9         | 47.3% | 52              | 88.2% | 19            | 76.0% |
| N/A                                    | 0          |       | 0         |       | 0         |       | 0               |       | 0             |       |
| <b>Tobacco Smoking</b>                 |            |       |           |       |           |       |                 |       |               |       |
| No                                     | 7          | 70.0% | 14        | 63.6% | 4         | 21.0% | 14              | 23.7% | 5             | 20.0% |
| Yes                                    | 0          | 0.0%  | 2         | 9.1%  | 3         | 15.7% | 20              | 33.8% | 16            | 64.0% |
| Former                                 | 3          | 30.0% | 6         | 27.3% | 3         | 15.7% | 24              | 40.6% | 2             | 8.0%  |
| N/A                                    | 0          |       | 0         |       | 9         | 47.3% | 1               | 1.7%  | 2             | 8.0%  |
| <b>Alcohol Consumption</b>             |            |       |           |       |           |       |                 |       |               |       |
| No                                     | 2          | 20.0% | 9         | 40.9% | 6         | 31.6% | 23              | 38.9% | 14            | 56.0% |
| Yes                                    | 8          | 80.0% | 13        | 59.1% | 4         | 21.0% | 21              | 35.6% | 8             | 32.0% |
| N/A                                    | 0          |       | 0         |       | 9         | 47.3% | 15              | 25.4% | 3             | 12.0% |
| <b>Tumor Localization</b>              |            |       |           |       |           |       |                 |       |               |       |
| Upper Third                            |            |       |           |       |           |       | 0               | 0.0%  | 1             | 4.0%  |
| Middle Third                           |            |       |           |       |           |       | 10              | 16.9% | 13            | 52.0% |
| Lower Third                            |            |       |           |       |           |       | 37              | 62.7% | 10            | 40.0% |
| N/A                                    |            |       |           |       |           |       | 12              | 20.3% | 1             | 4.0%  |
| <b>Tumor Differentiation</b>           |            |       |           |       |           |       |                 |       |               |       |
| Well-differentiated                    |            |       |           |       |           |       | 2               | 3.4%  | 2             | 8.0%  |
| Moderately-differentiated              |            |       |           |       |           |       | 34              | 57.6% | 16            | 64.0% |
| Poorly-differentiated                  |            |       |           |       |           |       | 19              | 32.2% | 5             | 20.0% |
| N/A                                    |            |       |           |       |           |       | 4               | 6.7%  | 2             | 8.0%  |
| <b>Tumor Stage</b>                     |            |       |           |       |           |       |                 |       |               |       |
| I                                      |            |       |           |       |           |       | 3               | 5.1%  | 2             | 8.0%  |
| II                                     |            |       |           |       |           |       | 11              | 18.6% | 4             | 16.0% |
| III                                    |            |       |           |       |           |       | 16              | 27.1% | 7             | 28.0% |
| IV                                     |            |       |           |       |           |       | 2               | 3.4%  | 4             | 16.0% |
| N/A                                    |            |       |           |       |           |       | 27              | 45.7% | 8             | 32.0% |
| <b>Gastroesophageal Reflux History</b> |            |       |           |       |           |       |                 |       |               |       |
| No                                     | 7          | 70.0% | 17        | 77.3% | 63        | 66.3% |                 |       |               |       |
| Yes                                    | 3          | 30.0% | 5         | 5.3%  | 14        | 14.7% |                 |       |               |       |
| N/A                                    | 0          |       | 0         |       | 18        | 18.9% |                 |       |               |       |

N/A: not informed

NOE: non-obese individuals

OE: obese individuals

BE: Barrett's esophagus patients

EAC: esophageal adenocarcinoma patients

ESCC: esophageal squamous cell carcinoma patients

Supplementary Table 2: Association analysis between Perilipin-2 and COX2 staining and baseline characteristics of Barrett's esophagus (BE), esophageal adenocarcinoma (EAC) and esophageal squamous cell carcinoma (ESCC) patients investigated in the study.

| Characteristics              | Perilipin-2 staining |          |            |          |             |          | COX2 staining |          |            |          |             |          |
|------------------------------|----------------------|----------|------------|----------|-------------|----------|---------------|----------|------------|----------|-------------|----------|
|                              | BE (n=19)            |          | EAC (n=59) |          | ESCC (n=25) |          | BE (n=19)     |          | EAC (n=59) |          | ESCC (n=25) |          |
|                              | Positive             | Negative | Positive   | Negative | Positive    | Negative | Positive      | Negative | Positive   | Negative | Positive    | Negative |
| <b>Age</b>                   |                      |          |            |          |             |          |               |          |            |          |             |          |
| r                            | 0.355                |          | 0.003      |          | 0.47        |          | 0.0456        |          | 0.1361     |          | 0.2743      |          |
| p                            | 0.14                 |          | 0.98       |          | 0.02        |          | 0.86          |          | 0.36       |          | 0.18        |          |
| <b>Gender</b>                |                      |          |            |          |             |          |               |          |            |          |             |          |
| Female                       | 7                    | 3        | 4          | 3        | 2           | 4        | 3             | 6        | 7          | 4        | 3           | 0        |
| Male                         | 6                    | 3        | 34         | 18       | 8           | 11       | 5             | 5        | 27         | 21       | 18          | 4        |
| p                            | 1.00                 |          | 0.69       |          | 1.00        |          | 0.64          |          | 0.68       |          | 1.00        |          |
| <b>Tobacco Smoking</b>       |                      |          |            |          |             |          |               |          |            |          |             |          |
| Never                        | 3                    | 1        | 8          | 6        | 3           | 3        | 1             | 2        | 6          | 4        | 3           | 2        |
| Yes                          | 6                    | 0        | 29         | 15       | 6           | 12       | 3             | 4        | 27         | 21       | 14          | 5        |
| N/A                          | 9                    |          | 1          |          | 1           |          | 9             |          | 1          |          | 1           |          |
| p                            | 0.40                 |          | 0.75       |          | 0.34        |          | 1.00          |          | 1.00       |          | 0.30        |          |
| <b>Alcohol Consumption</b>   |                      |          |            |          |             |          |               |          |            |          |             |          |
| Never                        | 5                    | 1        | 9          | 14       | 4           | 4        | 2             | 3        | 12         | 5        | 5           | 3        |
| Yes                          | 4                    | 0        | 23         | 13       | 5           | 9        | 1             | 4        | 21         | 21       | 10          | 4        |
| N/A                          | 9                    |          |            |          | 3           |          | 9             |          |            |          | 3           |          |
| p                            | 1.00                 |          | 0.11       |          | 0.66        |          | 1.00          |          | 0.13       |          | 1.00        |          |
| <b>Tumor Localization</b>    |                      |          |            |          |             |          |               |          |            |          |             |          |
| Middle Third                 |                      |          | 2          | 3        | 6           | 8        |               |          | 8          | 4        | 9           | 4        |
| Lower Third                  |                      |          | 30         | 13       | 3           | 7        |               |          | 19         | 17       | 7           | 4        |
| N/A                          |                      |          | 11         |          | 1           |          |               |          | 11         |          | 1           |          |
| p                            |                      |          | 0.32       |          | 0.68        |          |               |          | 0.50       |          | 0.77        |          |
| <b>Tumor Differentiation</b> |                      |          |            |          |             |          |               |          |            |          |             |          |
| Well-differentiated          |                      |          | 1          | 1        | 1           | 1        |               |          | 0          | 2        | 2           | 1        |
| Moderately-differentiated    |                      |          | 24         | 12       | 7           | 9        |               |          | 23         | 14       | 7           | 10       |
| Poorly-differentiated        |                      |          | 12         | 7        | 1           | 4        |               |          | 10         | 8        | 2           | 3        |
| N/A                          |                      |          | 2          |          |             |          |               |          | 2          |          |             |          |
| p                            |                      |          | 0.87       |          | 0.60        |          |               |          | 0.08       |          | 0.35        |          |
| <b>Tumor Stage</b>           |                      |          |            |          |             |          |               |          |            |          |             |          |
| Early                        |                      |          | 11         | 3        | 2           | 4        |               |          | 7          | 4        | 6           | 0        |
| Late                         |                      |          | 9          | 9        | 4           | 7        |               |          | 9          | 12       | 4           | 7        |
|                              |                      |          | 17         |          | 8           |          |               |          | 17         |          | 8           |          |
| p                            |                      |          | 0.15       |          | 1.00        |          |               |          | 0.43       |          | 0.034       |          |
| <b>Dysplasia</b>             |                      |          |            |          |             |          |               |          |            |          |             |          |
| No                           | 6                    | 0        |            |          |             |          | 5             | 5        |            |          |             |          |
| Yes                          | 7                    | 6        |            |          |             |          | 6             | 3        |            |          |             |          |
| p                            | 0.044                |          |            |          |             |          | 0.62          |          |            |          |             |          |

BE: Barrett's esophagus patients

EAC: esophageal adenocarcinoma patients

ESCC: esophageal squamous cell carcinoma patients

N/A: not informed

Supplementary Table 3: Clinicopathological characteristics of the esophageal adenocarcinoma (EAC) and esophageal squamous cell carcinoma (ESCC) patients from The Cancer Genome Atlas (TCGA) evaluated in the study

| Characteristics                        | EAC (n=89)   |       | ESCC (n=95) |       |
|----------------------------------------|--------------|-------|-------------|-------|
|                                        | n            | %     | n           | %     |
| <b>Age</b>                             |              |       |             |       |
| Median (years)                         | 69.5         |       | 57.0        |       |
| (Range)                                | (27-86)      |       | (36-90)     |       |
| <b>Follow-up</b>                       |              |       |             |       |
| Median (months)                        | 7.0          |       | 12.65       |       |
| (Range)                                | (0.36-83.18) |       | (0.3-67.97) |       |
| <b>Gender</b>                          |              |       |             |       |
| Female                                 | 12           | 13.5% | 14          | 14.7% |
| Male                                   | 76           | 85.4% | 81          | 85.3% |
| N/A                                    | 1            | 1.1%  | 0           |       |
| <b>Tobacco Smoking</b>                 |              |       |             |       |
| No                                     | 24           | 27.0% | 32          | 33.7% |
| Yes                                    | 8            | 9.0%  | 29          | 30.5% |
| Former                                 | 42           | 47.2% | 30          | 31.6% |
| N/A                                    | 15           | 16.9% | 4           | 4.2%  |
| <b>Alcohol Consumption</b>             |              |       |             |       |
| No                                     | 27           | 30.3% | 24          | 25.3% |
| Yes                                    | 60           | 67.4% | 69          | 72.6% |
| N/A                                    | 2            | 2.2%  | 2           | 2.1%  |
| <b>Tumor Localization</b>              |              |       |             |       |
| Upper Third                            | 0            | 0.0%  | 6           | 6.3%  |
| Middle Third                           | 5            | 5.6%  | 44          | 46.3% |
| Lower Third                            | 83           | 93.3% | 44          | 46.3% |
| N/A                                    | 1            | 1.1%  | 1           | 1.1%  |
| <b>Tumor Differentiation</b>           |              |       |             |       |
| Well-differentiated                    | 3            | 3.4%  | 16          | 16.8% |
| Moderately-differentiated              | 28           | 31.5% | 48          | 50.5% |
| Poorly-differentiated                  | 27           | 30.3% | 21          | 22.1% |
| N/A                                    | 31           | 34.8% | 10          | 10.5% |
| <b>Tumor Stage</b>                     |              |       |             |       |
| I                                      | 8            | 9.0%  | 21          | 22.1% |
| II                                     | 30           | 33.7% | 38          | 40.0% |
| III                                    | 34           | 38.2% | 28          | 29.5% |
| IV                                     | 11           | 12.4% | 6           | 6.3%  |
| N/A                                    | 6            | 6.7%  | 2           | 2.1%  |
| <b>Gastroesophageal Reflux History</b> |              |       |             |       |
| No                                     | 33           | 37.1% | 63          | 66.3% |
| Yes                                    | 43           | 48.3% | 14          | 14.7% |
| N/A                                    | 13           | 14.6% | 18          | 18.9% |
| <b>Esophagus Columnar Metaplasia</b>   |              |       |             |       |
| No                                     | 29           | 32.6% | 47          | 49.5% |
| Yes                                    | 31           | 34.8% | 1           | 1.1%  |
| N/A                                    | 29           | 32.6% | 47          | 49.5% |

N/A: not informed

EAC: esophageal adenocarcinoma patients

ESCC: esophageal squamous cell carcinoma patients

Supplementary Table 4: Association analysis between *PLIN2* expression and baseline characteristics of esophageal adenocarcinoma (EAC) and esophageal squamous cell carcinoma (ESCC) patients from The Cancer Genome Atlas (TCGA) investigated in the study.

| Characteristics                        | <i>PLIN2</i> |               |
|----------------------------------------|--------------|---------------|
|                                        | EAC (n=89)   | ESCC (n=95)   |
| <b>Age (years)</b>                     |              |               |
| r                                      | -0,01        | -0.11         |
| p                                      | 0.922        | 0.288         |
| <b>Gender</b>                          |              |               |
| Female                                 | 825.0        | 141.5         |
| Male                                   | 870.6        | 392.9         |
| p                                      | 0.571        | <b>0.0078</b> |
| <b>Tobacco Smoking</b>                 |              |               |
| No                                     | 1034.0       | 1034.0        |
| Yes                                    | 810.1        | 810.1         |
| p                                      | 0.19         | 0.19          |
| <b>Alcohol Consumption</b>             |              |               |
| No                                     | 874.7        | 437.0         |
| Yes                                    | 810.1        | 376.1         |
| p                                      | 0.786        | 0.4528        |
| <b>Tumor Localization</b>              |              |               |
| Upper Third                            | 0            | 519.1         |
| Middle Third                           | 1283.0       | 338,9         |
| Lower Third                            | 815.6        | 357,8         |
| p                                      | 0.1          | 0.528         |
| <b>Tumor Differentiation</b>           |              |               |
| Well-differentiated                    | 671.4        | 397.2         |
| Moderately-differentiated              | 867.4        | 335.1         |
| Poorly-differentiated                  | 994.2        | 648.2         |
| p                                      | 0.215        | 0.215         |
| <b>Tumor Stage</b>                     |              |               |
| Early (I + II)                         | 660.3        | 320.6         |
| Late (III+IV)                          | 896.4        | 429.7         |
| p                                      | 0.062        | 0.352         |
| <b>Esophagus Columnar Metaplasia</b>   |              |               |
| No                                     | 796.4        |               |
| Yes                                    | 896.4        |               |
| p                                      | 0.756        |               |
| <b>Gastroesophageal Reflux History</b> |              |               |
| No                                     | 854.2        |               |
| Yes                                    | 866.4        |               |
| p                                      | 0.966        |               |

*PLIN2* expression levels are expressed in RSEM+1

EAC: esophageal adenocarcinoma patients

ESCC: esophageal squamous cell carcinoma patients
